# Supplementary material for: Cryogenic Comminution of Subsea Cables and Flowlines: A Pathway for Circular Recycling of End-of-Life Offshore Infrastructure
Source: MDPI journal article supplement (doi:10.3390/su152115651), 2023-11-06
Supplement: s1 [file s1]

## Cryogenic Commintion of Subsea Cables and Flowlines: A Pathway for Circular Recycling of End-of-Life Offshore Infrastructure

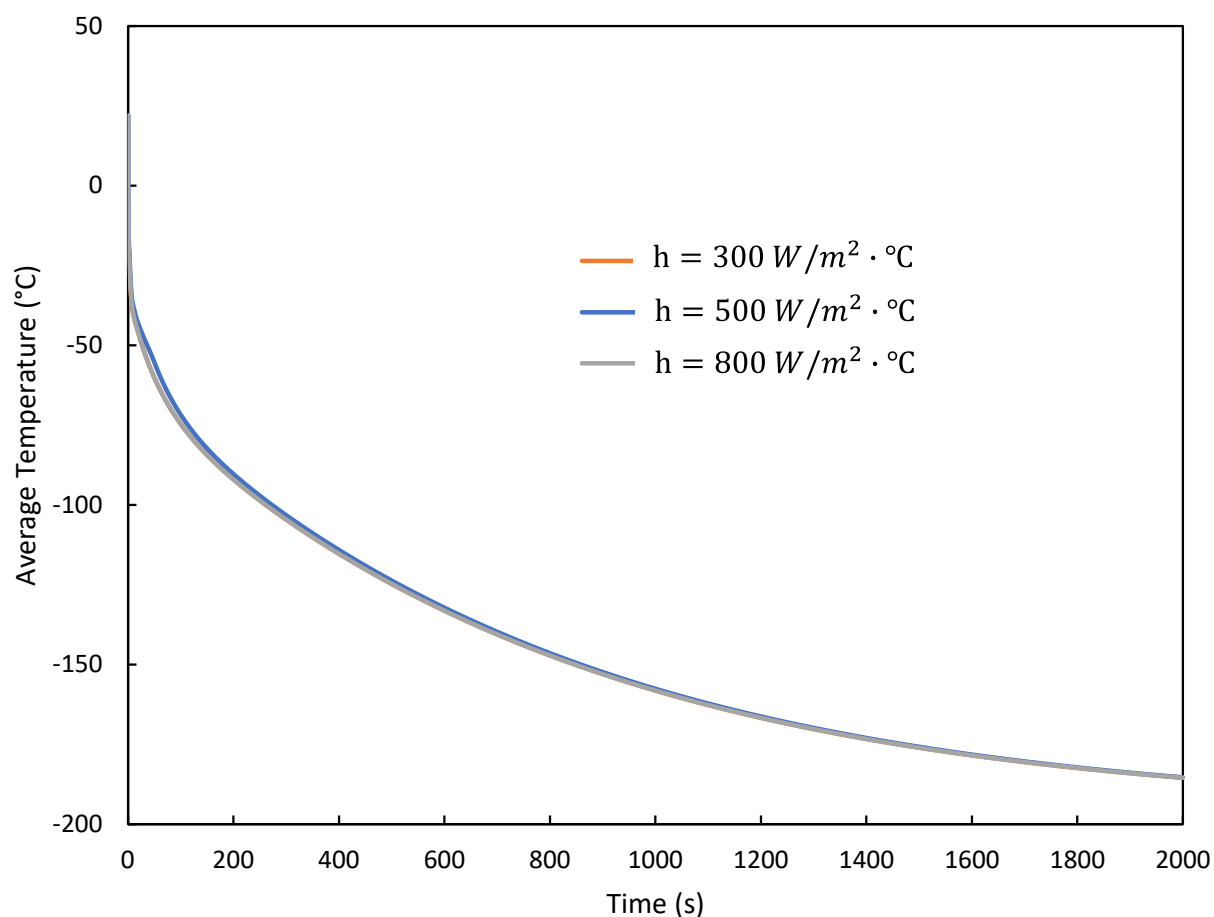

**Figure S1.** Variations in average temperature of the flexible flowline (i.e., average of all layers of the flowline during cryogenic cooling).

## Cryogenic Commminution of Subsea Cables and Flowlines: A Pathway for Circular Recycling of End-of-Life Offshore Infrastructure

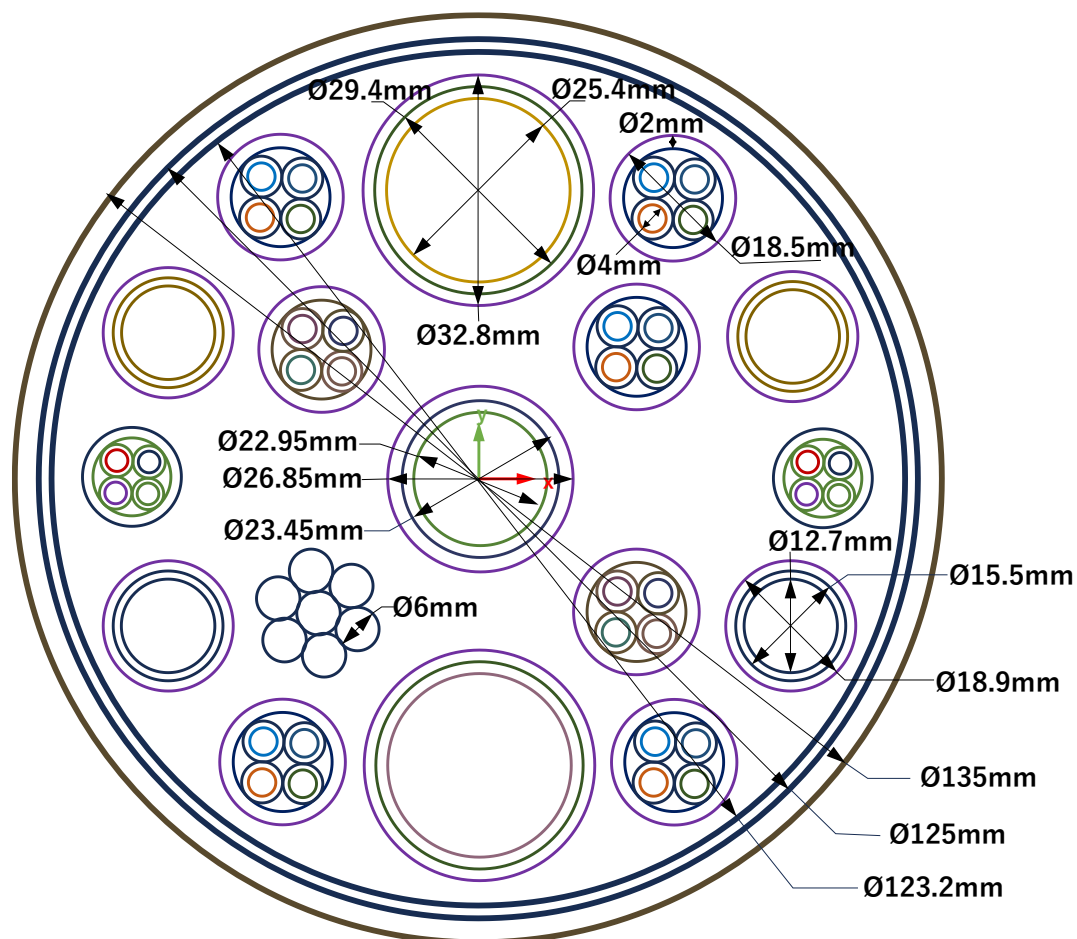

**Figure S2.** Schematic of umbilical cable cross-section with an outer diameter of 135 mm. Outer sheath: polyethylene; internal plastics: polyamide; filling material: epoxy thermoset; electrical insulation: PVC, etc.
