# Supplementary material for: Cryogenic Comminution of Subsea Cables and Flowlines: A Pathway for Circular Recycling of End-of-Life Offshore Infrastructure
Source: MDPI journal article supplement (doi:10.3390/su152115651), 2023-11-06
Supplement: s1 [file s1]

Archive with 1 entries (1 files):
- sustainability-2637645-supplementary.pdf
